# Supplementary material for: Effect of water state and polymer chain motion on the mechanical properties of a bacterial cellulose and polyvinyl alcohol (BC/PVA) hydrogel
Source: Royal Society of Chemistry journal article supplement (doi:10.1039/c4ra11594e), 2015-01-01
Supplement: c4ra11594e1.pdf [file c4ra11594e1.pdf]

*Supporting Information*

**Effect of water state and polymer chain motion on the mechanical properties of a bacterial cellulose and polyvinyl alcohol (BC/PVA) hydrogel**

Lifeng Li, *et al.*

Table. SI1 Contents of BC and PVA in BC/PVA hydrogel group I

|          | B0.5P15   | B0.7P15   | B1.0P15   | B1.5P15   |
|----------|-----------|-----------|-----------|-----------|
| BC(wt%)  | 0.56±0.08 | 0.67±0.06 | 0.97±0.10 | 1.42±0.07 |
| PVA(wt%) | 13.57     | 14.08     | 14.65     | 14.98     |

Table. SI2 Contents of BC and PVA in BC/PVA hydrogel group II

|          | B0.5P10   | B0.5P15   | B0.5P20   | B0.5P25   |
|----------|-----------|-----------|-----------|-----------|
| BC(wt%)  | 0.51±0.03 | 0.56±0.08 | 0.78±0.04 | 0.86±0.02 |
| PVA(wt%) | 8.19      | 13.57     | 20.95     | 25.49     |

Table. SI3 Contents of BC and PVA in BC/PVA hydrogel group III

|          | B1.0P10   | B1.5P15   | B2.0P20   | B3.0P30   |
|----------|-----------|-----------|-----------|-----------|
| BC(wt%)  | 1.23±0.07 | 1.42±0.07 | 2.03±0.03 | 3.08±0.02 |
| PVA(wt%) | 9.16      | 14.98     | 22.25     | 27.51     |

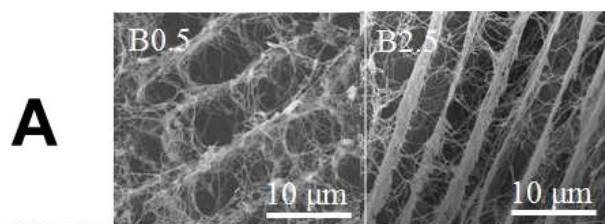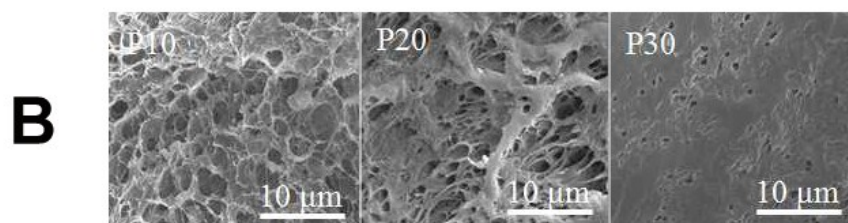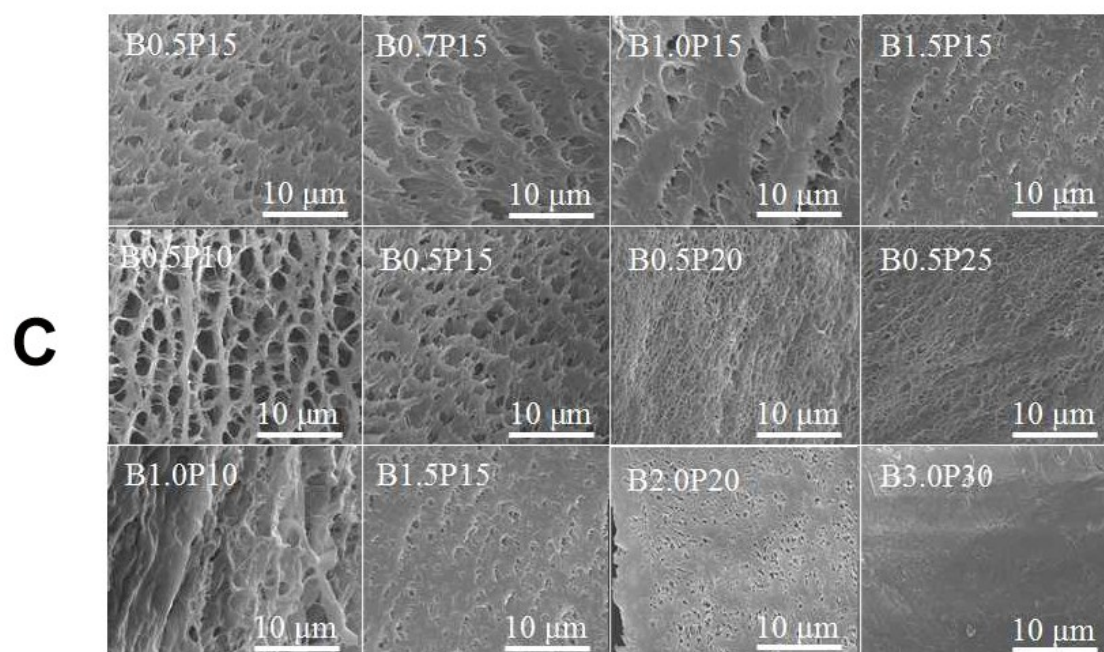

Fig.S11-1 SEM image of A: BC, B: PVA, and C: BC/PVA hydrogels.

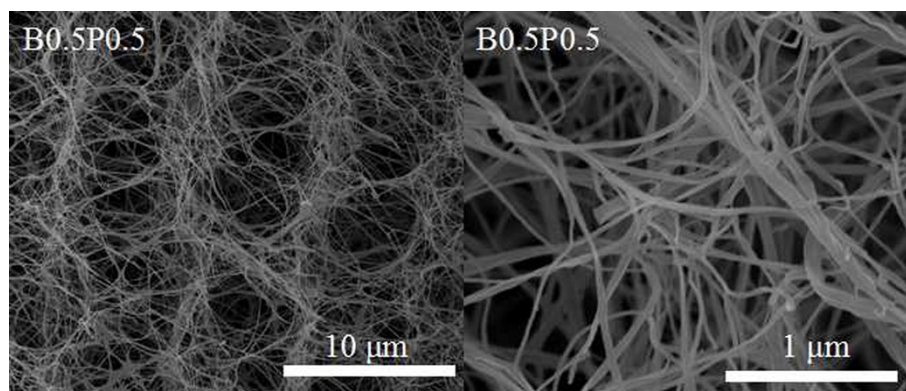

Fig.S11-2 SEM image of BC/PVA hydrogel ( B0.5P0.5 with 0.5wt% BC and 0.5wt% PVA ).

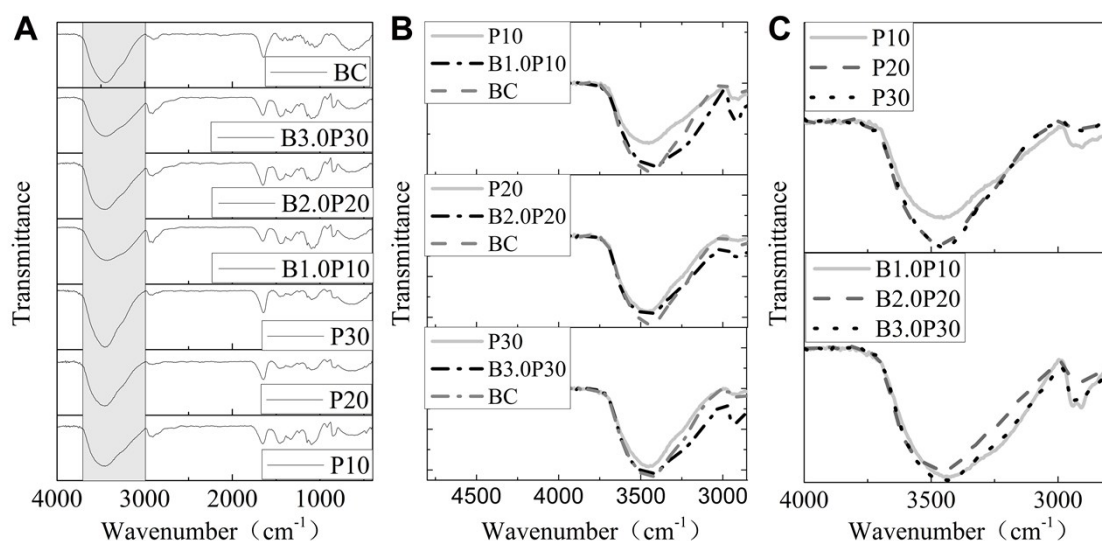

Fig. S12 FTIR spectra of BC, PVA, BC/PVA hydrogels. A: FTIR spectra of BC (B2.5), BC/PVA hydrogels (B1.0P10, B2.0P20, B3.0P30) and pure PVA hydrogels (P10, P20, P30); B: the variation between BC, PVA and BC/PVA hydrogels (wavenumber range of 4000-3000  $\text{cm}^{-1}$ ); C: the variation of pure PVA and BC/PVA hydrogels with different PVA content (wavenumber range of 4000-3000  $\text{cm}^{-1}$ ).

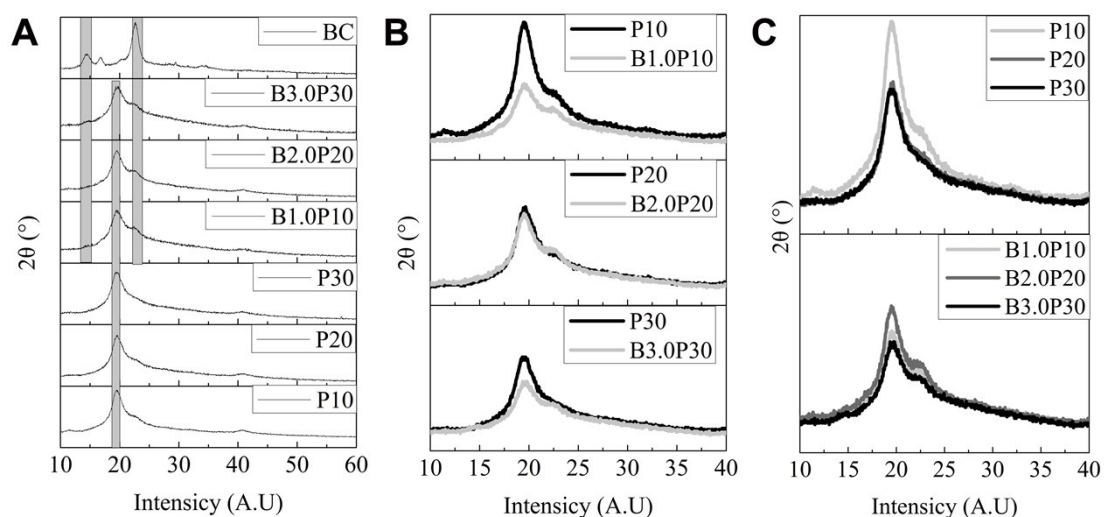

Fig. S13 XRD pattern of BC, PVA, BC/PVA hydrogels. A: XRD pattern of BC (B2.5), BC/PVA hydrogels (B1.0P10, B2.0P20, B3.0P30), and pure PVA hydrogels (P10, P20, P30); B: the variation between PVA and BC/PVA hydrogels; C: the variation of PVA and BC/PVA hydrogels with different PVA content.

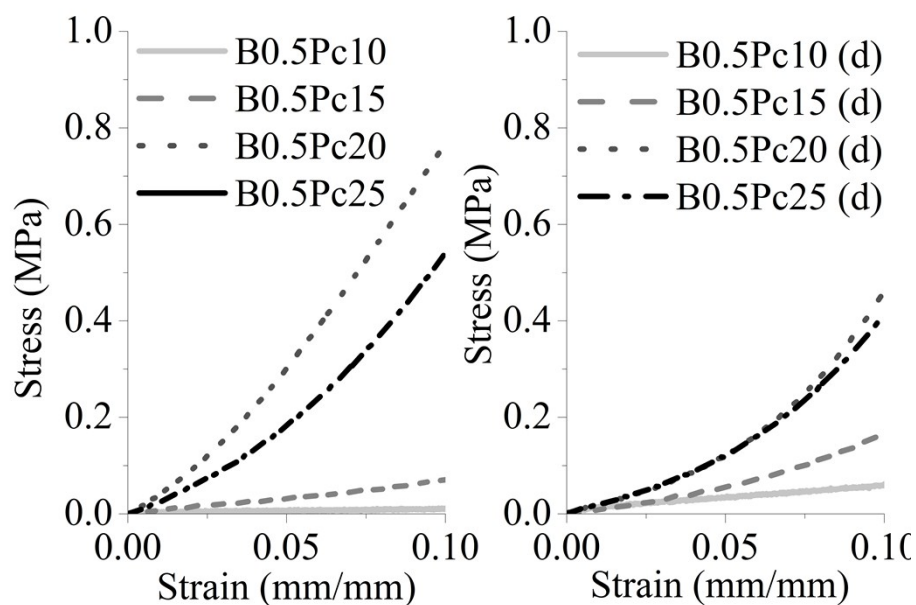

Fig.S14 Effect of the dehydration on the compression properties of BC/PVA hydrogel. A: Stress-strain curve (strain range of 0-0.1mm/mm) of original samples (B0.5Pc10, B0.5Pc15, B0.5Pc20, and B0.5Pc25); and B: Stress-strain curve (strain range of 0-0.1mm/mm) of dehydrated samples (B0.5Pc10(d), B0.5Pc15(d), B0.5Pc20(d), B0.5Pc25(d)); (The PVA molecular weight used in this BC/PVA hydrogel is 146 ~ 186kg mol<sup>-1</sup>, it was purchased from Sigma. )

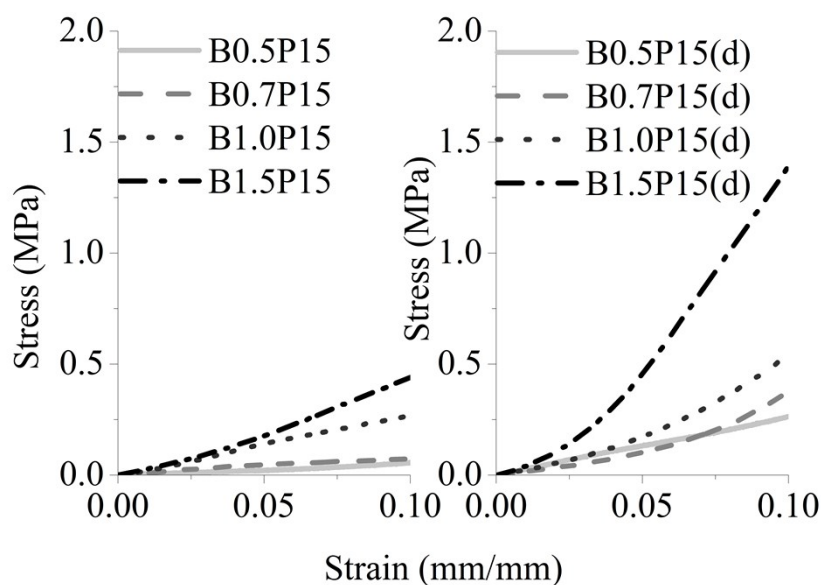

Fig. S15 Effect of the dehydration on the compression properties of BC/PVA hydrogel. A: Stress-strain curve (strain range of 0-0.1mm/mm) of original sample (B0.5P15, B0.7P15, B1.0P15, B1.5P15); and B: Stress-strain curve (strain range of 0-0.1mm/mm) of dehydrated samples (B0.5P15 (d), B0.7P15 (d), B1.0P15(d), B1.5P1a5(d));

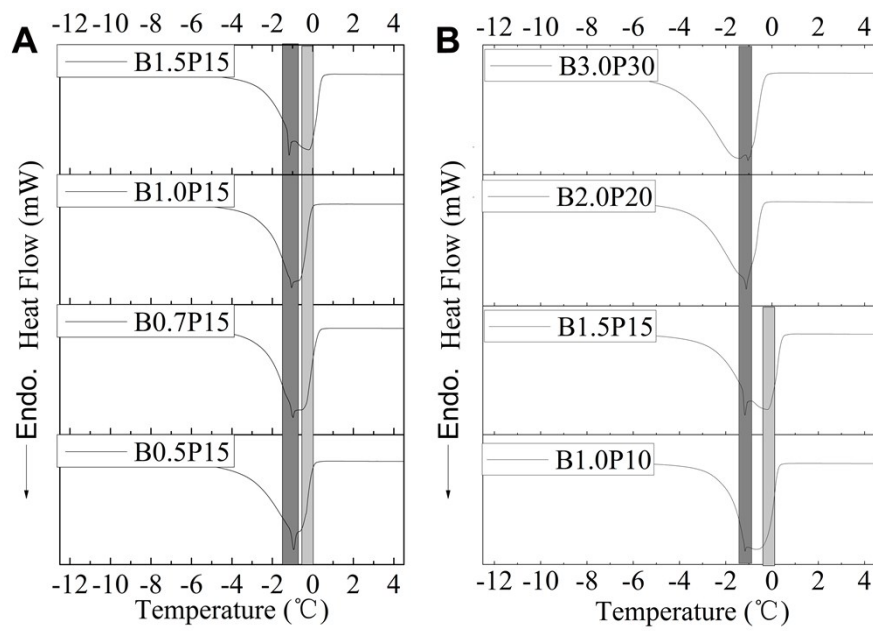

Fig. S16 DSC curves of water in BC/PVA hydrogels. A: DSC curves of water in samples of B0.5P15, B0.7P15, B1.0P15, B1.5P15; B: DSC curves of water in samples of B1.0P10, B1.5P15, B2.0P20, B3.0P30

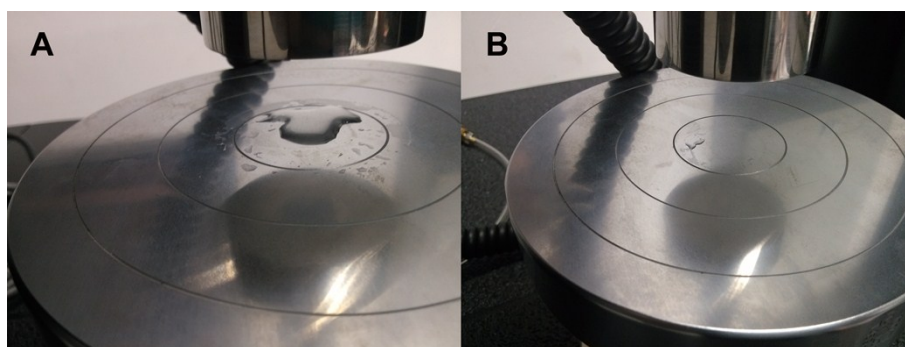

Fig. S17 The remaining water on compression plate of BB0.5P10 (A) and B0.5P20 (B) after compression test

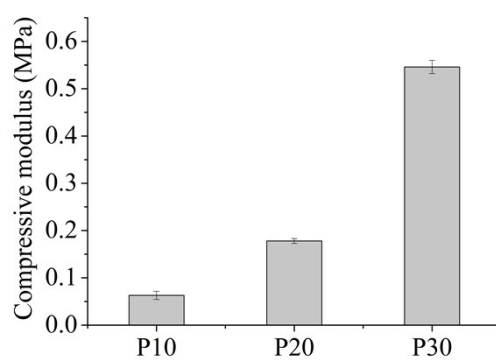

Fig. S18 Compressive modulus of pure PVA hydrogels
